# Supplementary material for: A Monte Carlo simulation of tracer diffusion in amorphous polymers
Source: Royal Society of Chemistry journal article supplement (doi:10.1039/d4sm00782d), 2024-01-01
Supplement: d4sm00782d1.pdf [file d4sm00782d1.pdf]

## Supplementary Information: A Monte Carlo Simulation of Tracer Diffusion in Amorphous Polymers

Ali Mansuri,<sup>a,b</sup> Paras Vora,<sup>a</sup> Tim Feuerbach,<sup>c</sup> Judith Winck,<sup>a</sup> A. W. P Vermeer,<sup>d</sup> Werner Hoheisel,<sup>c</sup> Jan Kierfeld,<sup>e</sup> and Markus Thommes<sup>\*a</sup>

<sup>a</sup> Department of Biochemical and Chemical Engineering, TU Dortmund University, 44227 Dortmund, Germany

<sup>b</sup> INVITE GmbH, 51061 Cologne, Germany

<sup>c</sup> Bayer AG, 51368 Leverkusen, Germany

<sup>d</sup> ENVU, 2022 ES Deutschland GmbH, 40789 Monheim, Germany

<sup>e</sup> Department of Physics, TU Dortmund University, 44221 Dortmund, Germany

### Part I: Tracer Diffusivities of IMC and DLM for Different Decoupling Scenarios

Figs. S1 and S2 present, respectively, tracer diffusivities of IMC and DLM in the polymers of this study under the three scenarios corresponding to waiting time–rotational time relation: 1) volume-based interpretation of decoupling  $\xi = \tilde{V}_D / (\tilde{V}_D + \tilde{V}_{0,P})$ , 2) decoupling related to the stretching exponent of rotational correlation function  $\xi = \beta_{KWW}$ , and 3) the fragility-dependent interpretation  $\xi = 1.1 - 0.005m$ . In all cases, the volume-based interpretation delivers the strongest temperature dependence and the smallest diffusivities.

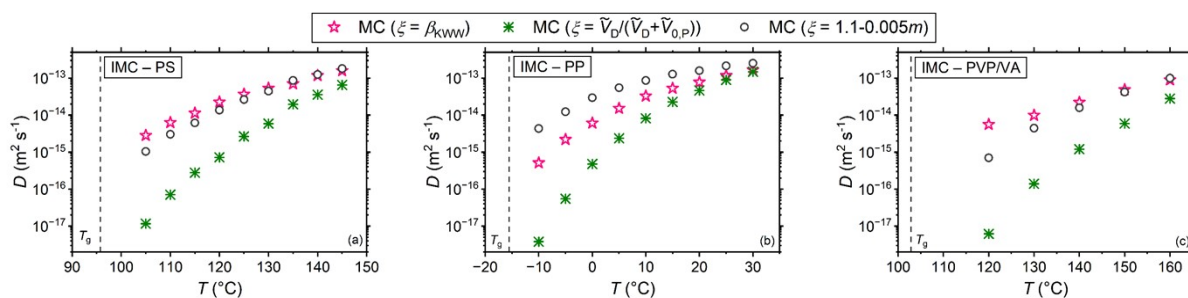

Fig. S1 Tracer diffusivities of IMC in (a) PS, (b) PP, and (c) PVP/VA.

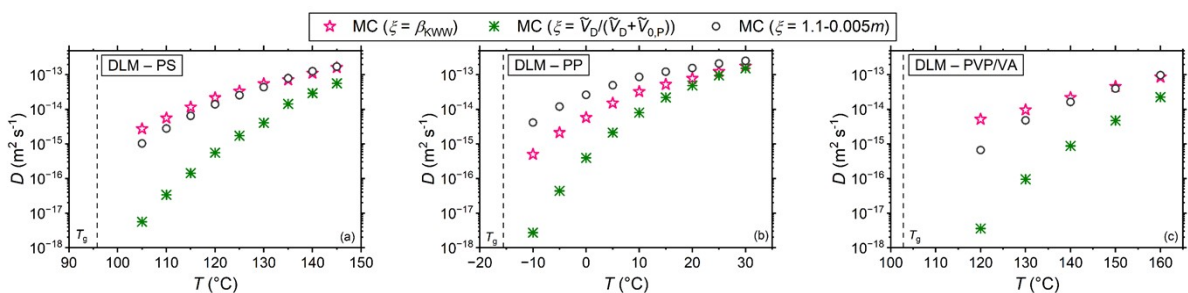

Fig. S2 Tracer diffusivities of DLM in (a) PS, (b) PP, and (c) PVP/VA.

## Part II: Values of the Decoupling Exponent $\xi$

The estimated  $\xi$  values used in this study are summarized in Table S1. The volume-based correlation treats  $\xi$  as a binary parameter, whereas the other two approaches consider  $\xi$  at infinite dilution to be a pure polymer property.

**Table S1** Values of  $\xi$  used for the tracer diffusivity simulations of this work.

|            | adjusted $\xi^a$ | $\xi = \bar{V}_D / (\bar{V}_D + \bar{V}_P)$ | $\xi = 1.1 - 0.005m^b$ | $\xi = \beta_{KWW}^a$       |
|------------|------------------|---------------------------------------------|------------------------|-----------------------------|
| TET-PS     | 0.305 to 0.630   | 0.642                                       |                        |                             |
| BPEA-PS    | 0.755 to 0.820   | 0.764                                       |                        |                             |
| TTI-PS     | 0.500 to 0.782   | 0.678                                       |                        |                             |
| RUB-PS     | 0.991 to 1.229   | 0.814                                       | 0.434                  | 0.368 to 0.472 <sup>c</sup> |
| IMI-PS     |                  | 0.642                                       |                        |                             |
| DLM-PS     |                  | 0.770                                       |                        |                             |
| IMC-PS     |                  | 0.724                                       |                        |                             |
| IMI-PP     |                  | 0.815                                       |                        |                             |
| DLM-PP     |                  | 0.892                                       | 0.336                  | 0.500 to 0.731 <sup>d</sup> |
| IMC-PP     |                  | 0.866                                       |                        |                             |
| IMI-PVP/VA |                  | 0.692                                       |                        |                             |
| DLM-PVP/VA |                  | 0.808                                       | 0.470                  | 0.333 to 0.500 <sup>e</sup> |
| IMC-PVP/VA |                  | 0.767                                       |                        |                             |

<sup>a</sup> Because  $\xi$  becomes temperature-dependent a range is reported.

<sup>b</sup> The fragility indices  $m$  can be found in a previous work.<sup>1</sup>

<sup>c</sup> For detailed values see Table S2

<sup>d</sup> For detailed values see Table S3

<sup>e</sup> For detailed values see Table S4

### Part III: Parameters of the Stretched Exponential Functions

Tables S2 to S4 list  $\tau_{KWW}$  and  $\beta_{KWW}$  obtained from dielectric spectra,<sup>1-3</sup> for PP, PS, and PVP/VA, respectively. These were used to obtain the waiting time distributions according to eqn (8) of the main manuscript.

**Table S2** Stretched exponential parameters of PS.

| T (K) | $\tau_{KWW}$ (s)      | $\beta_{KWW}$ (-) |
|-------|-----------------------|-------------------|
| 378   | $2.99 \times 10^{-1}$ | 0.3679            |
| 383   | $2.80 \times 10^{-2}$ | 0.3799            |
| 388   | $4.05 \times 10^{-3}$ | 0.3843            |
| 393   | $8.26 \times 10^{-4}$ | 0.3850            |
| 398   | $2.01 \times 10^{-4}$ | 0.4010            |
| 403   | $6.19 \times 10^{-5}$ | 0.3980            |
| 408   | $1.67 \times 10^{-5}$ | 0.4622            |
| 413   | $6.55 \times 10^{-6}$ | 0.4624            |
| 418   | $3.04 \times 10^{-6}$ | 0.4724            |

**Table S3** Stretched exponential parameters of PP.

| T (K) | $\tau_{KWW}$ (s)      | $\beta_{KWW}$ (-) |
|-------|-----------------------|-------------------|
| 263   | $9.90 \times 10^{-2}$ | 0.5001            |
| 268   | $4.64 \times 10^{-3}$ | 0.5134            |
| 273   | $4.35 \times 10^{-4}$ | 0.5402            |
| 278   | $7.03 \times 10^{-5}$ | 0.5585            |
| 283   | $1.63 \times 10^{-5}$ | 0.5770            |
| 288   | $5.83 \times 10^{-6}$ | 0.6228            |
| 293   | $2.65 \times 10^{-6}$ | 0.6768            |
| 298   | $1.29 \times 10^{-6}$ | 0.6919            |
| 303   | $7.73 \times 10^{-7}$ | 0.7308            |

**Table S4** Stretched exponential parameters of PVP/VA.

| T (K) | $\tau_{KWW}$ (s)      | $\beta_{KWW}$ (-) |
|-------|-----------------------|-------------------|
| 393   | $1.72 \times 10^{-1}$ | 0.3332            |
| 403   | $5.06 \times 10^{-3}$ | 0.3931            |
| 413   | $3.56 \times 10^{-4}$ | 0.4277            |
| 423   | $4.91 \times 10^{-5}$ | 0.4501            |
| 433   | $8.35 \times 10^{-6}$ | 0.4999            |

## Part IV: Lennard–Jones Diameters

The Lennard–Jones diameters  $\sigma$  of the species used for obtaining jump lengths according to eqn (16) are presented in Table S5.

**Table S5** Lennard–Jones diameters of the investigated species.

| substance        | $\sigma$ (Å) |
|------------------|--------------|
| deltamethrin     | 10.50        |
| imidacloprid     | 8.53         |
| indomethacin     | 9.88         |
| rubrene          | 11.46        |
| BPEA             | 10.38        |
| tetracene        | 8.52         |
| TTI              | 8.99         |
| propylene        | 5.19         |
| styrene          | 7.01         |
| vinylpyrrolidone | 7.04         |
| vinyl acetate    | 6.50         |

## References:

- 1 A. Mansuri, M. Völkel, D. Mihiranga, T. Feuerbach, J. Winck, A. W. P. Vermeer, W. Hoheisel and M. Thommes, *Eur. J. Pharm. Biopharm.*, 2023, **190**, 107–120.
- 2 A. Mansuri, P. Münzner, A. Heermant, S. Hänsch, T. Feuerbach, B. Fischer, J. Winck, A. W. P. Vermeer, W. Hoheisel, R. Böhmer, C. Gainaru and M. Thommes, *Mol. Pharm.*, , DOI:10.1021/acs.molpharmaceut.2c01043.
- 3 A. Mansuri, P. Münzner, A. Heermant, F. Patzina, T. Feuerbach, J. Winck, A. W. P. Vermeer, W. Hoheisel, R. Böhmer, C. Gainaru and M. Thommes, *Mol. Pharm.*, , DOI:10.1021/acs.molpharmaceut.2c01042.
